# Supplementary material for: Unifying framework for assessing sensitivity for marine calcifiers to ocean alkalinity enhancement identifies winners, losers and biological thresholds – importance of caution with precautionary principle
Source: Copernicus journal article supplement (doi:10.5194/egusphere-2024-947), 2024-04-17

## Supplementary Material

### **Unifying framework for assessing sensitivity of marine calcifiers to ocean alkalinity enhancement identifies potential winners, losers and biological thresholds - importance of precautionary principle**

Nina Bednaršek<sup>1\*</sup>, Greg Pelletier<sup>2</sup>, Hanna van de Mortel<sup>3</sup>, Marisol García-Reyes<sup>4</sup>, Richard A. Feely<sup>5</sup>, Andrew G. Dickson<sup>6</sup>

<sup>1\*</sup>Cooperative Institute for Marine Ecosystem and Resources Studies, Hatfield Marine Science Center, Oregon State University, 2030 SE Marine Science Drive Newport, OR 97365, USA

<sup>2</sup>Washington Department of Ecology, Olympia, 300 Desmond Dr SE, WA 98503, USA (Emeritus)

<sup>3</sup>National Institute for Biology, Marine Biological Station, Fornače 41, Piran, Slovenia

<sup>4</sup>Farallon Institute, 101 St. Suite Q, Petaluma, CA 94952, United States

<sup>5</sup>NOAA Pacific Marine Environmental Laboratory, Seattle, WA, 98115 USA

<sup>6</sup>University of California at San Diego, Scripps Institution of Oceanography, 9500 Gilman Drive, La Jolla, CA 92093, USA (Emeritus)

*Correspondence to:* [nina.bednarsek@oregonstate.edu](mailto:nina.bednarsek@oregonstate.edu)

**Supplementary Table 1:** Regression analyses with fitted second-order polynomial equation exploring TA:DIC and  $\Omega_{ar}$  correlation over the 0-50 using various regional datasets and global GLODAP datasets. Shown are the coefficients for the second-order polynomial equation (see also Fig. 1), as well as goodness of fit ( $R^2$ ), significance ( $p$ ), standard error of regression ( $ser$ ) and number of observations (#).

| Region     | b1     | b2       | b3      | b4      | rsquared | pvalue | ser   | # obs |
|------------|--------|----------|---------|---------|----------|--------|-------|-------|
| Arctic     | 66.84  | -206.99  | 199.39  | -58.81  | 0.96     | 0      | 0.094 | 8991  |
| N-Pacific  | 346.73 | -972.25  | 896.08  | -269.98 | 0.991    | 0      | 0.05  | 6085  |
| C-Pacific  | 297.07 | -817.72  | 737.24  | -215.9  | 0.99     | 0      | 0.063 | 13101 |
| N-Atlantic | 411.4  | -1135.05 | 1030.06 | -305.76 | 0.993    | 0      | 0.044 | 4914  |
| C-Atlantic | 166.02 | -500.37  | 483.06  | -148.61 | 0.968    | 0      | 0.109 | 5466  |
| Indian     | 189.24 | -528.16  | 479.47  | -139.8  | 0.971    | 0      | 0.063 | 3560  |
| Southern   | 436.42 | -1216.31 | 1116.76 | -336.22 | 0.997    | 0      | 0.022 | 7052  |
| Global     | 86.94  | -254.47  | 233.73  | -65.8   | 0.99     | 0      | 0.095 | 56138 |

**Supplementary Figure 1:** The range of observed pH and DIC and TA values (as represented by the TA:DIC ratio) values and the relationship with the best fitted curve between TA:DIC vs. pH across regional (a-g) and global (h) scales based on the observational GLODAP data set averaged over 0-50 m depth.

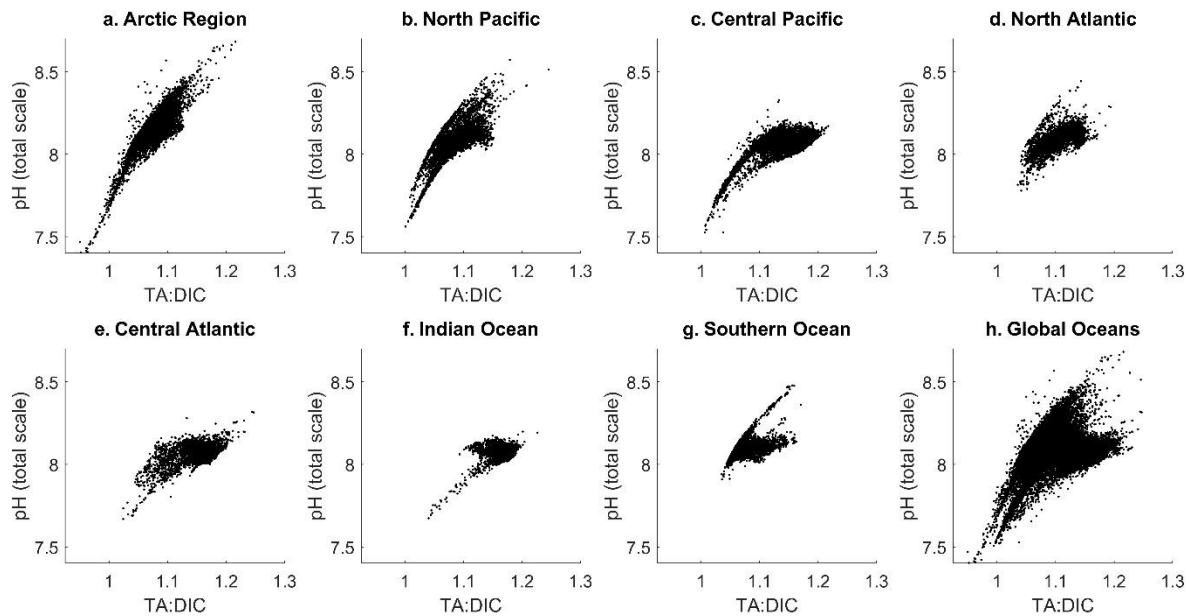

**Supplementary Figure 2:** Raw experimental data extracted from the OA studies or data bases to which the regression line with prediction error margins was fitted at various additions of alkalinity for the examined species (in alphabetical order). The uncertainty interval indicates four standard deviations. Blue horizontal dotted line indicates reduction of the half of the calcification rate, the red line indicates zero net dissolution (calcification rate is equal to 0; dissolution rate = calcification rate).

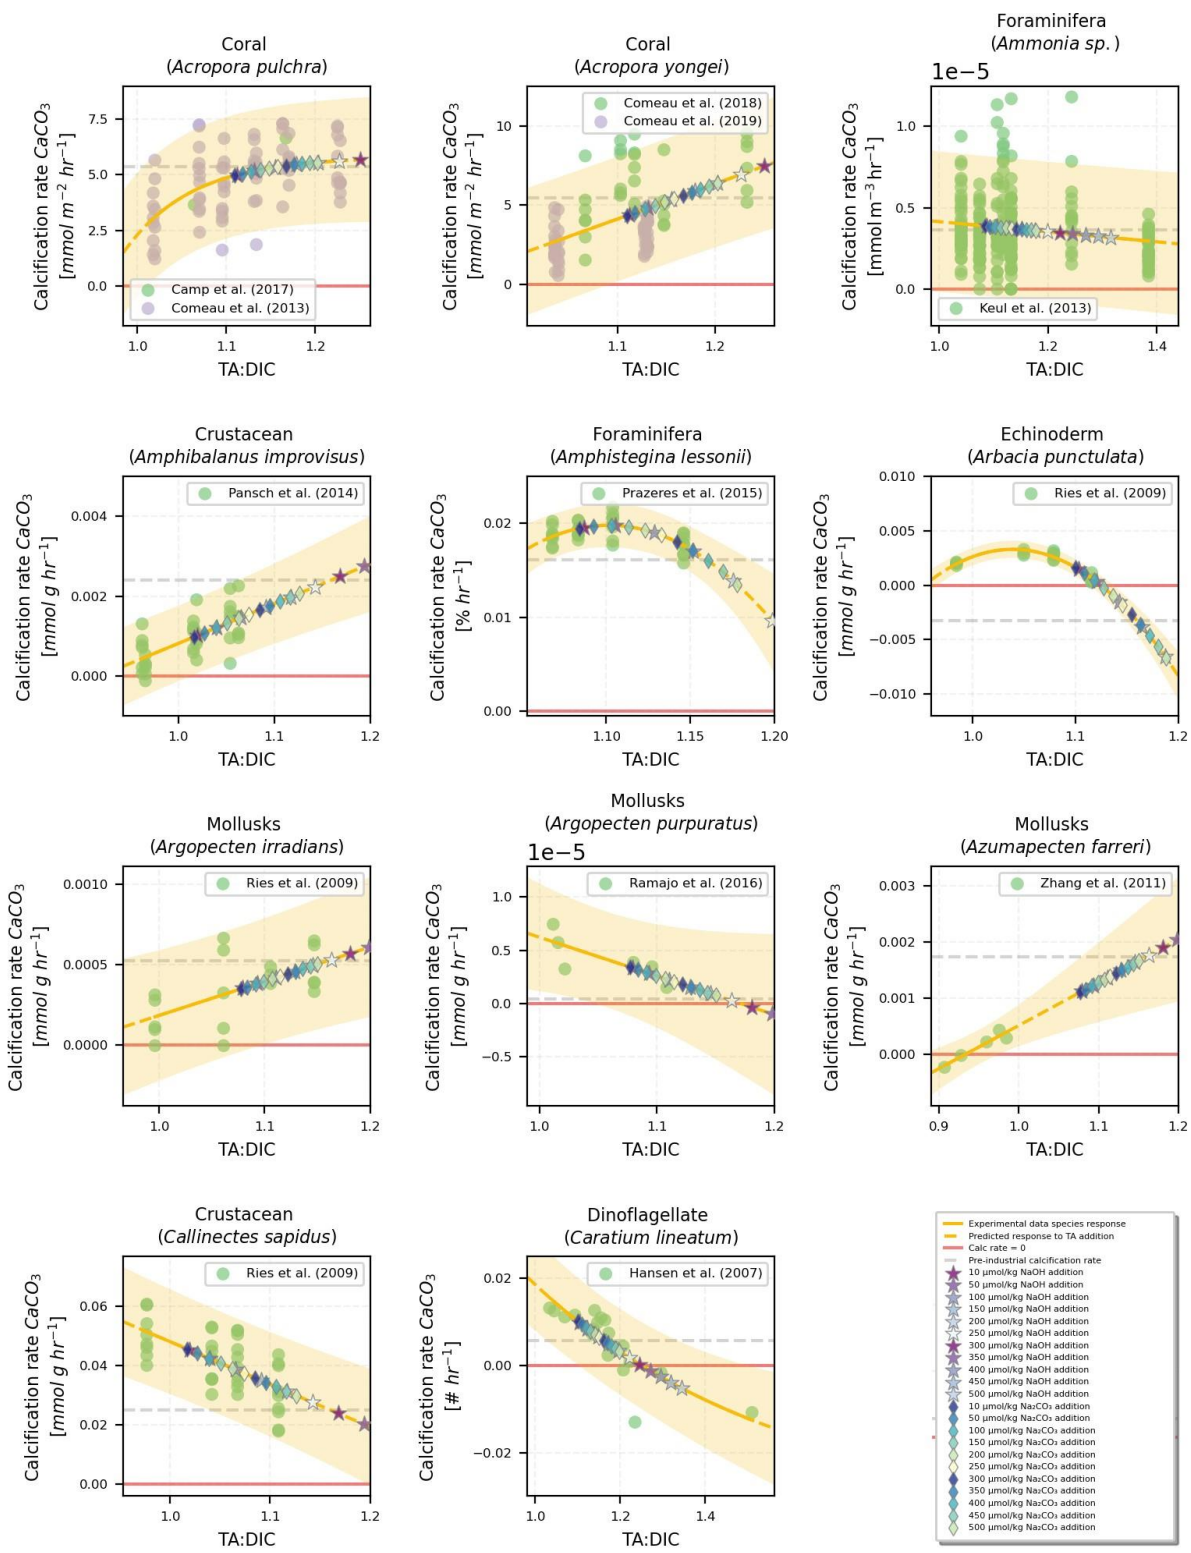

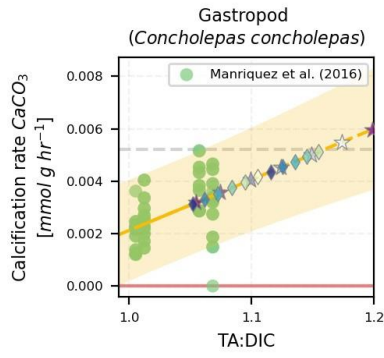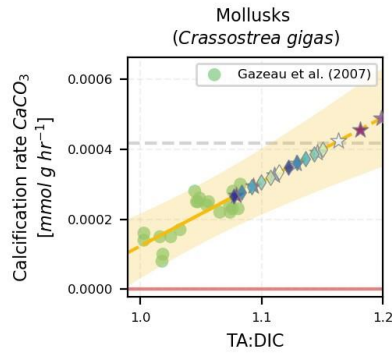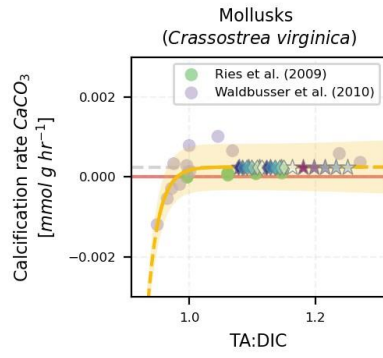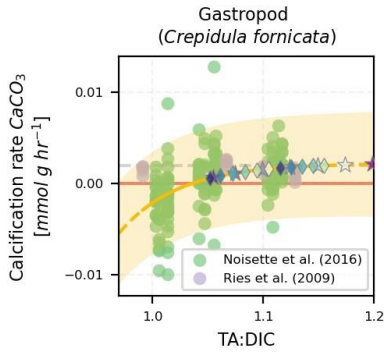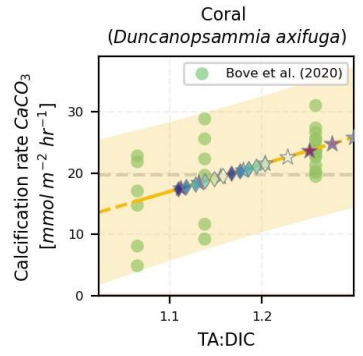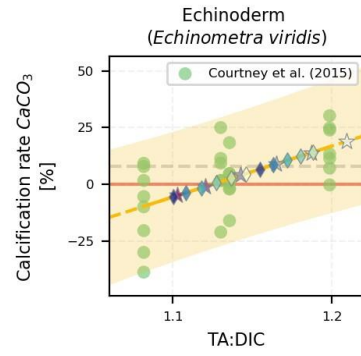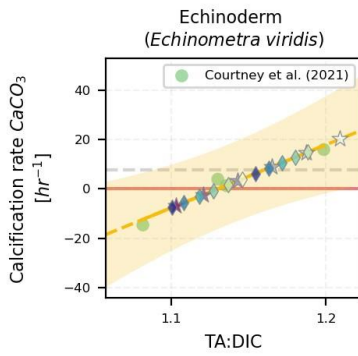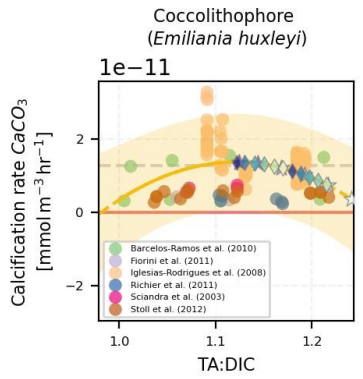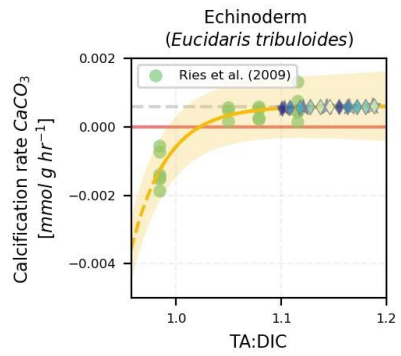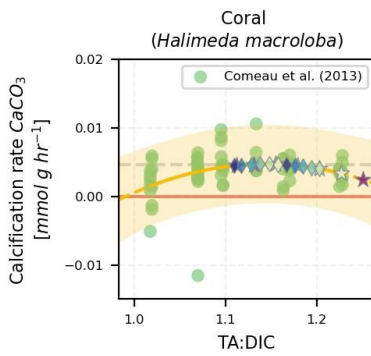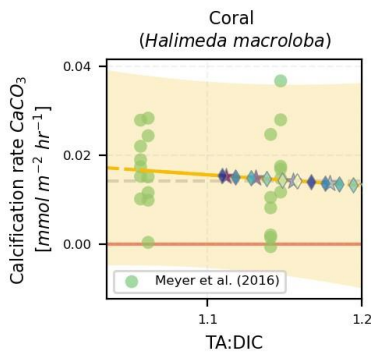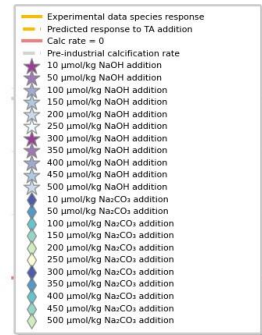

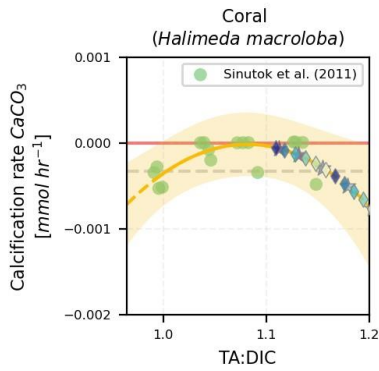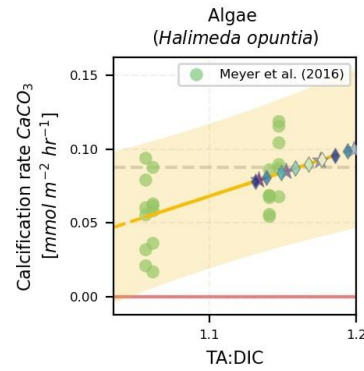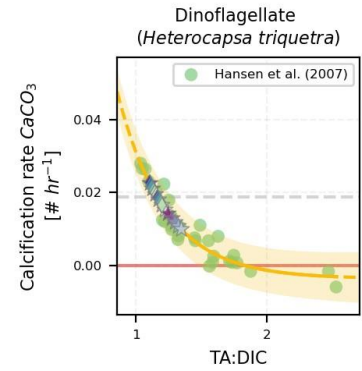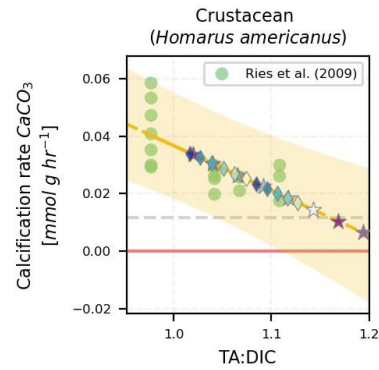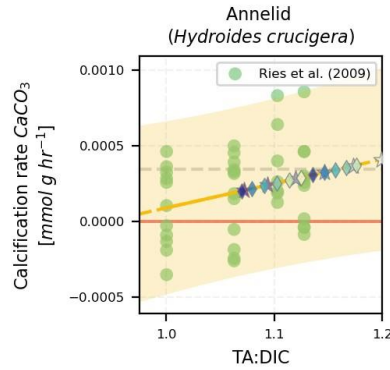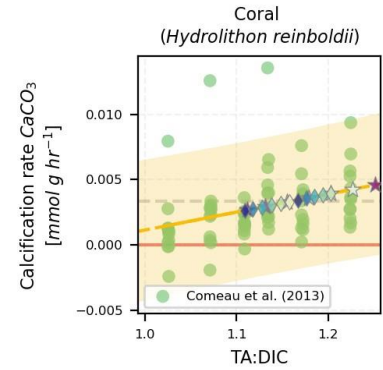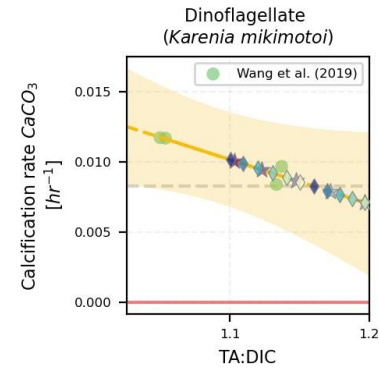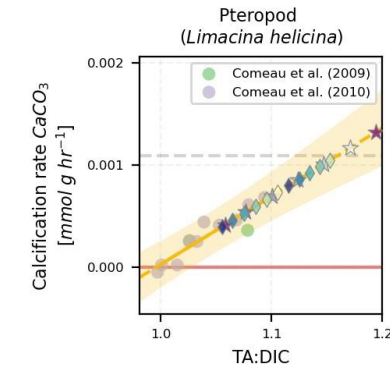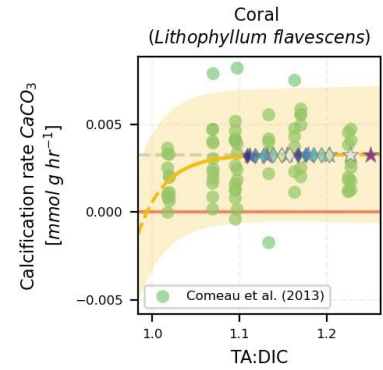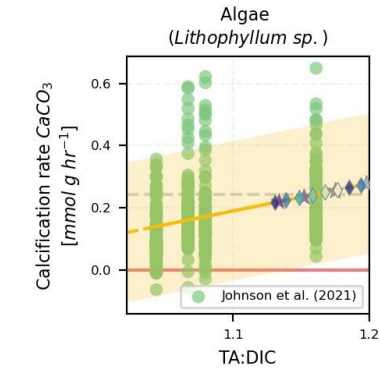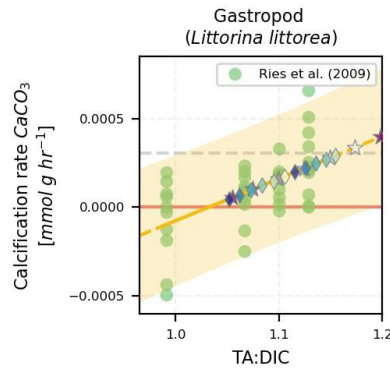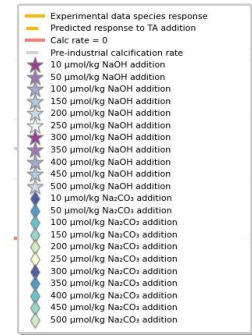

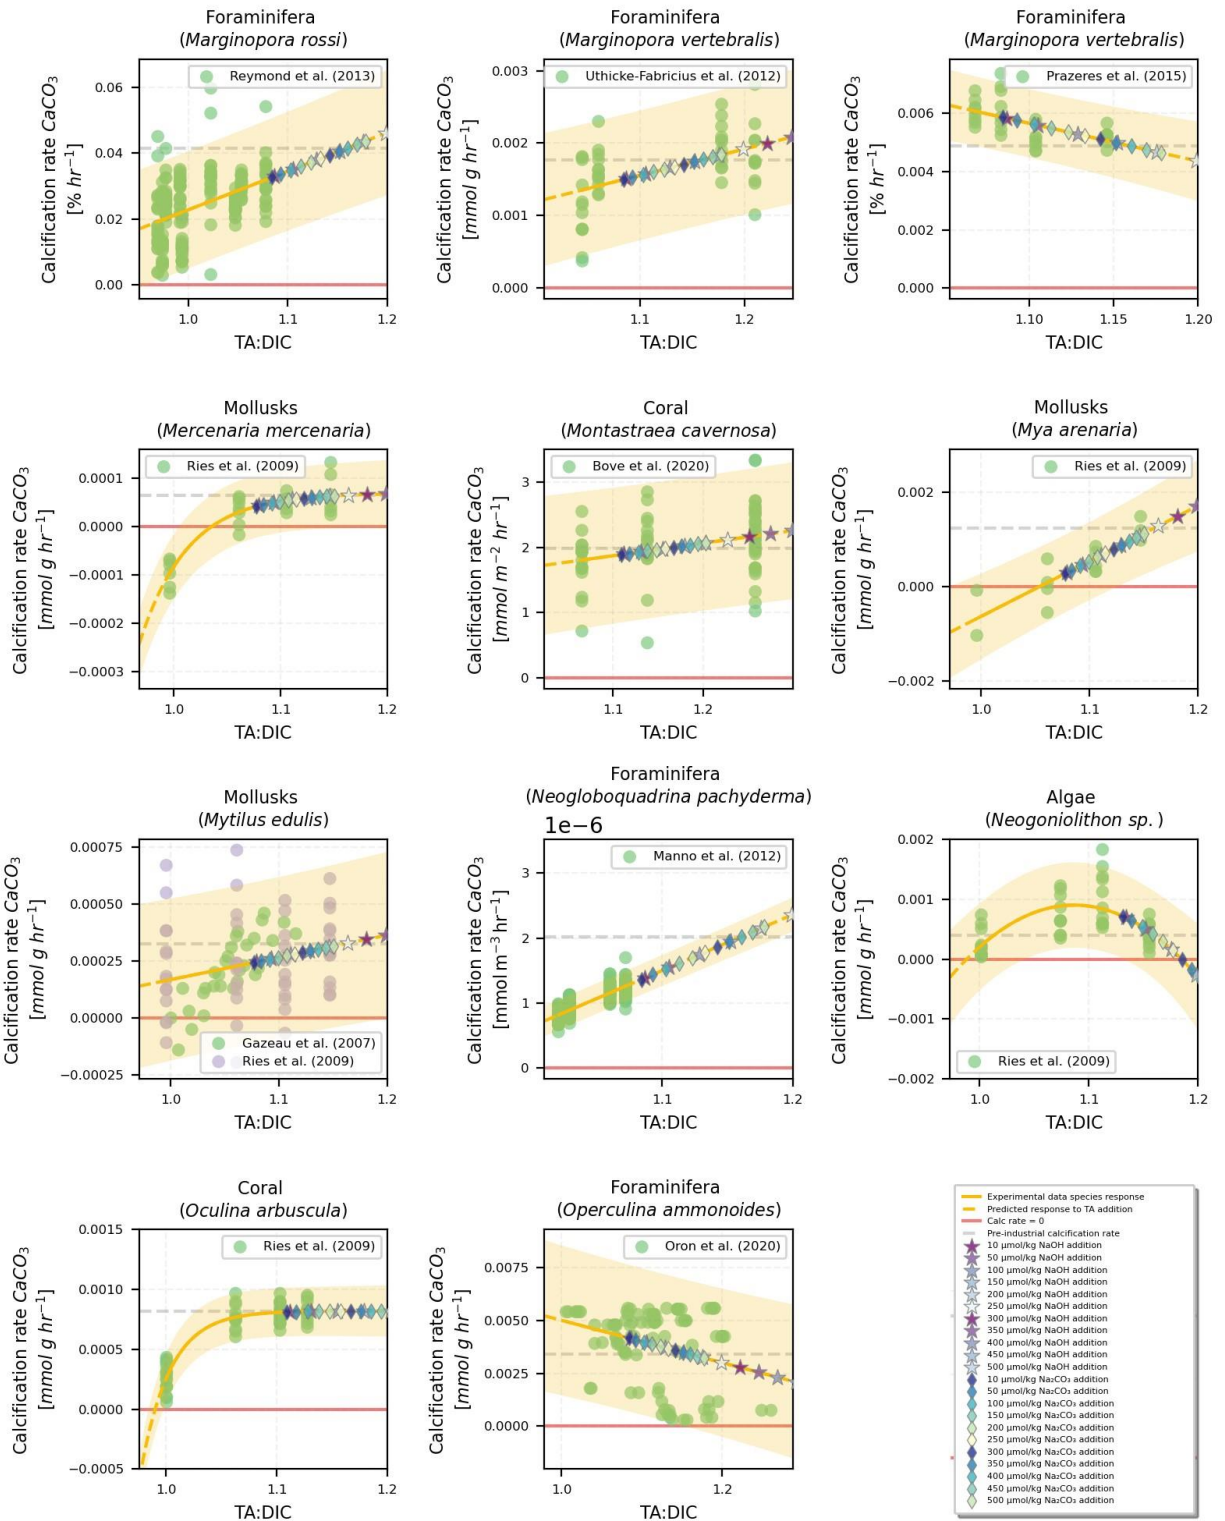

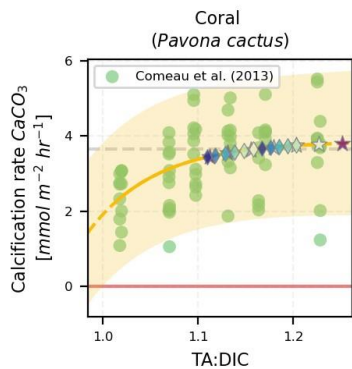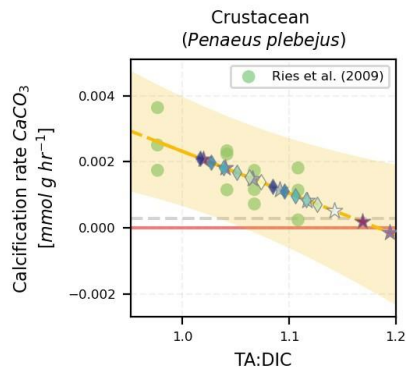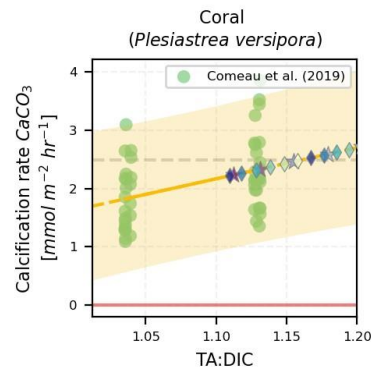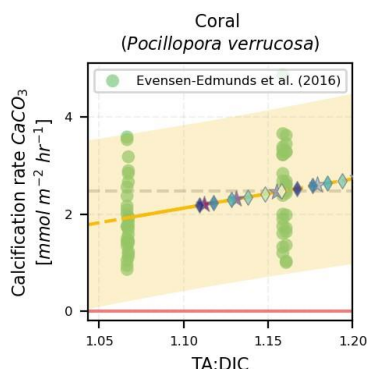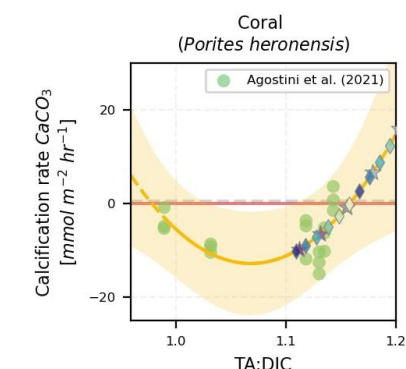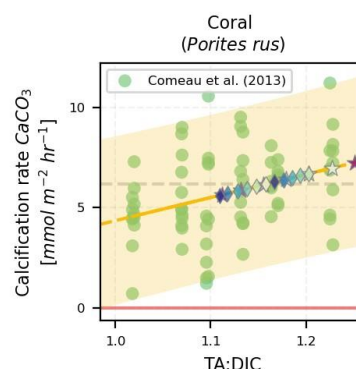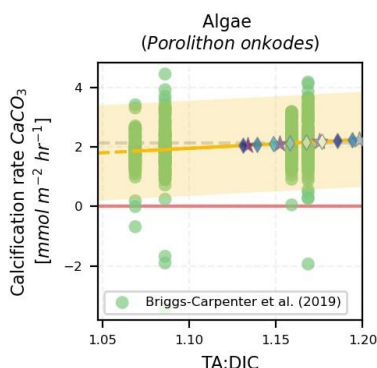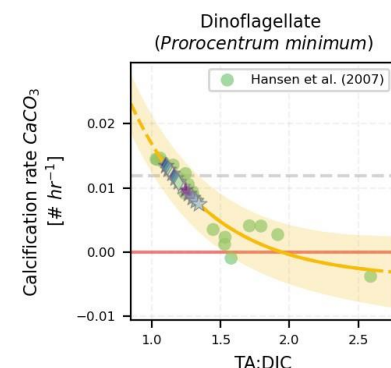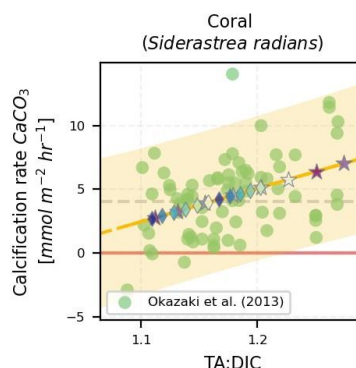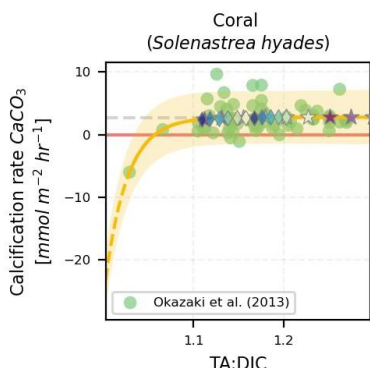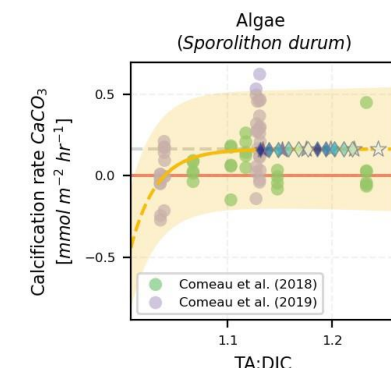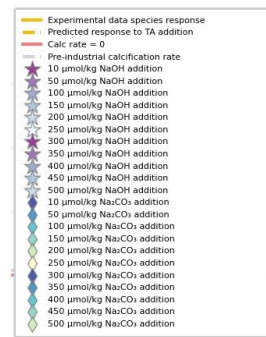

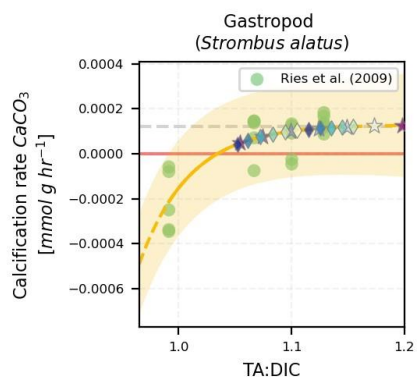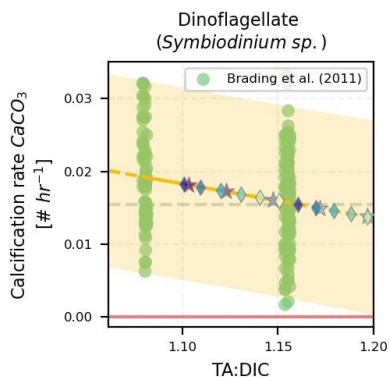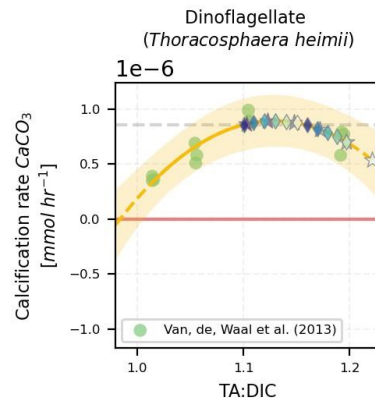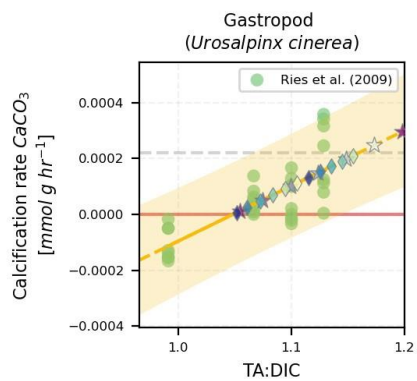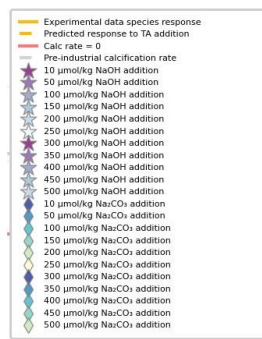

Supplement: Supplementary file 1 [file egusphere-2024-947-supplement.pdf]
